# Supplementary material for: Role of teichoic acids in Staphylococcus aureus nasal colonization, a major risk factor in nosocomial infections
Source: Springer Nature journal article supplement (doi:10.1038/nm991), 2004-02-01
Supplement: 41591_2004_BFnm991_MOESM1_ESM.pdf [file 41591_2004_BFnm991_MOESM1_ESM.pdf]

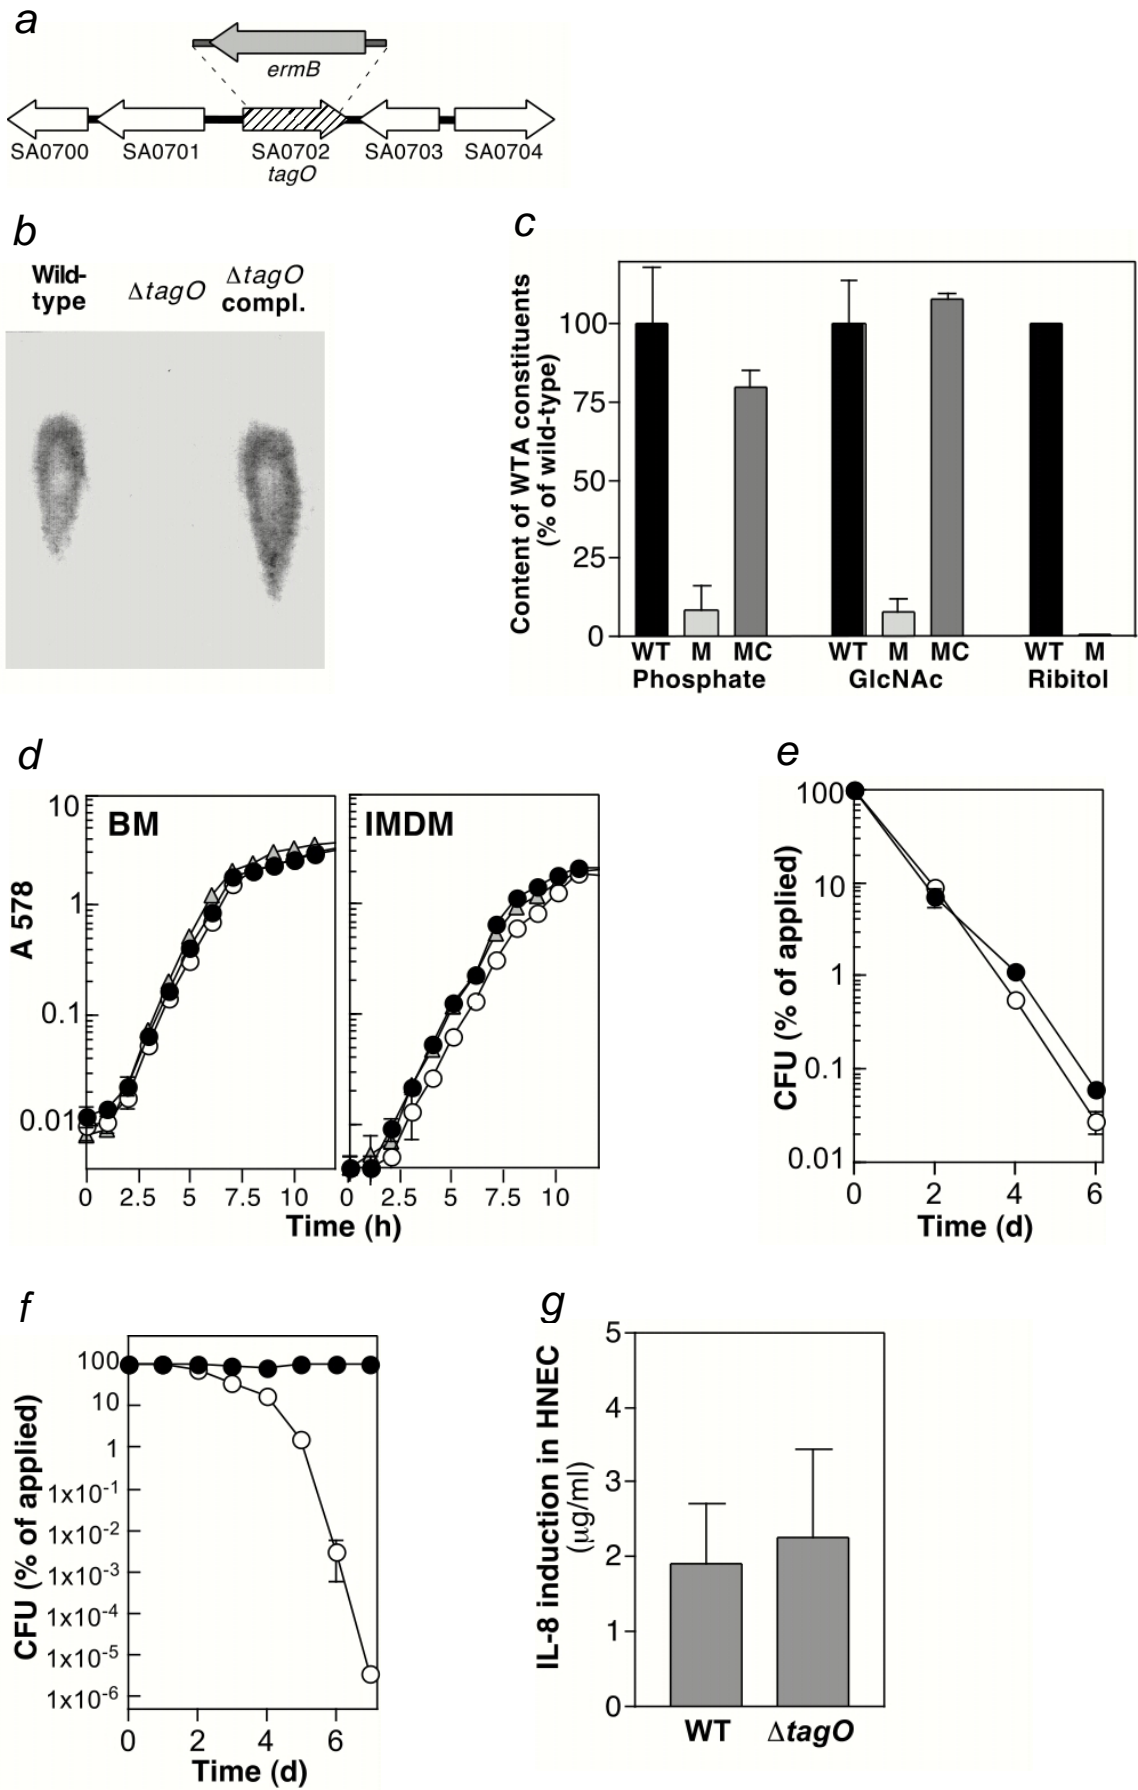

Weidenmaier et al. Supplementary Fig. 1

### Legend to supplementary figure 1:

Generation and evaluation of *S. aureus*  $\Delta tagO$ . (a) Location *tagO* and strategy for its replacement with the *ermB* cassette. (b) Polyacrylamide gel with WTA preparations stained by a combined alcian blue and silver stain procedure. (c) WTA deficiency in *S. aureus*  $\Delta tagO$ . Content of phosphate, GlcNAc, and ribitol in WTA preparations from *S. aureus* SA113 wild-type (WT),  $\Delta tagO$  (M) and  $\Delta tagO$  complemented with plasmid pRBtagO (MC). Ribitol content was determined in WT and M samples only. The mean and SD of at least five independent experiments (phosphate, GlcNAc) or the mean of four counts from one experiment (ribitol) are shown. (d) Growth curves of *S. aureus* wild-type (solid circles),  $\Delta tagO$  (open circles), and  $\Delta tagO$  with pRBtagO (gray triangles) in complex (BM) or minimal medium (IMDM) under aeration at 30 °C. (e) Long-term survival kinetics of wild-type (solid circles) and  $\Delta tagO$  (open circles) in batch culture. (f) Stability of plasmid pRBtagO in the presence (solid circles) or absence (open circles) of chloramphenicol after repeated cultivation in BM broth. (g) IL-8 induction in HNEC by incubation with *S. aureus* wild-type or  $\Delta tagO$ . **d-g** show means and SD of three to four independent experiments.
